# Supplementary material
Source: Springer Nature journal article supplement (https://www.springermedizin.de/resource/supplementary/12961_2009_96_MOESM5_ESM.pdf/9571406)
Supplement: MOESM5 [file 9571406]

## Main focuses of analyses

| <b><u>Evaluation</u></b><br><i>Domains/<br/>Value areas</i> | <i>AFR</i>                 | <i>Management</i>            | <i>Human resources</i>      | <b>Social,<br/>cultural<br/>context</b> | <i>HIV/<br/>AIDS</i>                                                                                | <i>Emer.<br/>Obst.<br/>Care</i> | <i>Ma-<br/>laria</i> | <i>Gen.<br/>health<br/>care</i> |
|-------------------------------------------------------------|----------------------------|------------------------------|-----------------------------|-----------------------------------------|-----------------------------------------------------------------------------------------------------|---------------------------------|----------------------|---------------------------------|
| <b>Quality</b>                                              | Fairness                   | Leader-<br>ship              | Skills, task,<br>motivation | Quality<br>related                      | Process, procedure, resources, waiting,<br>adherence, outcome,                                      |                                 |                      |                                 |
| <b>Equity</b>                                               | Inclusion                  | Aims,<br>practice            | Coverage,<br>targets        | Equity<br>related                       | Coverage, availability, access, resource<br>and service distribution,                               |                                 |                      |                                 |
| <b>Trust</b>                                                | Accoun-<br>tability        | Stake-<br>holders            | Turnover,<br>relations      | Trust<br>related                        | Utilisation, acceptability, relations,<br>encounters, processes                                     |                                 |                      |                                 |
| <b>AFR<br/>conditions</b>                                   | Gaps in<br>Con-<br>ditions | Gaps,<br>practice,<br>themes | AFR skills                  | Relevance<br>inclusion,<br>fairness     | Accountability, transparency, leadership,<br>gaps in AFR conditions (also explore<br>under context) |                                 |                      |                                 |
